# Supplementary material for: Differences between high-sensitivity cardiac troponin T and I in stable populations: underlying causes and clinical implications
Source: publisher site journal article supplement (doi:10.1515/cclm-2022-0778), 2022-11-25
Supplement: Supplementary file 1 [file j_cclm-2022-0778_suppl.doc]

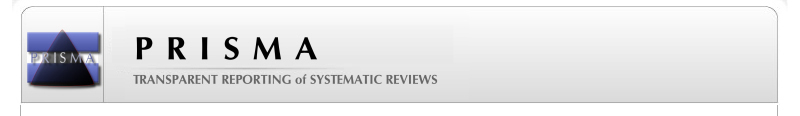
**PRISMA 2009 Flow Diagram**

**Screening**

**Included**

**Eligibility**

**Identification**

Records identified through database searching
(n=171)

Additional records identified through other sources
(n=5)

Records after duplicates removed
(n=176)

Records screened
(n=176)

Records excluded
(n=150)

Full-text articles assessed for eligibility
(n=26)

Full-text articles excluded:

• Review article (n=5)
• Other populations (n=6)

• No use of hs-cTn (n=1)

• Prognosis not studied (n=1)

Studies included in qualitative synthesis
(n = 13)

Studies included in quantitative synthesis (meta-analysis):

not applicable
